# Supplementary material for: Linking levee-building processes with channel avulsion: geomorphic analysis for assessing avulsion frequency and channel reoccupation
Source: Copernicus journal article supplement (doi:10.5194/esurf-10-743-2022), 2022-07-22
Supplement: Supplementary file 1 [file esurf-10-743-2022-supplement.pdf]

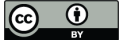

*Supplement of*

**Linking levee-building processes with channel  
avulsion: geomorphic analysis for assessing  
avulsion frequency and channel reoccupation**

**Jeongyeon Han and Wonsuck Kim**

*Correspondence to:* Wonsuck Kim ([delta@yonsei.ac.kr](mailto:delta@yonsei.ac.kr))

The copyright of individual parts of the supplement might differ from the article licence.

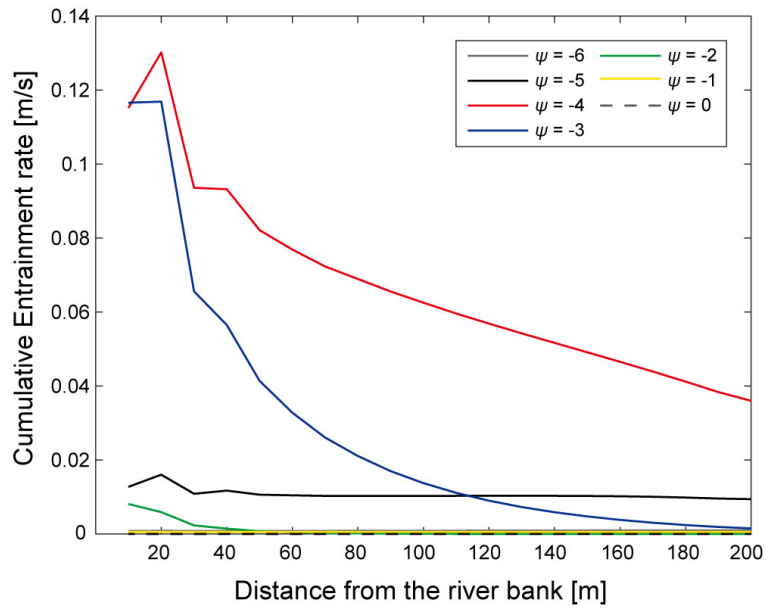

Figure S1. The cumulative Entrainment rate (E) of each grain size across the levee deposit for Test 2.

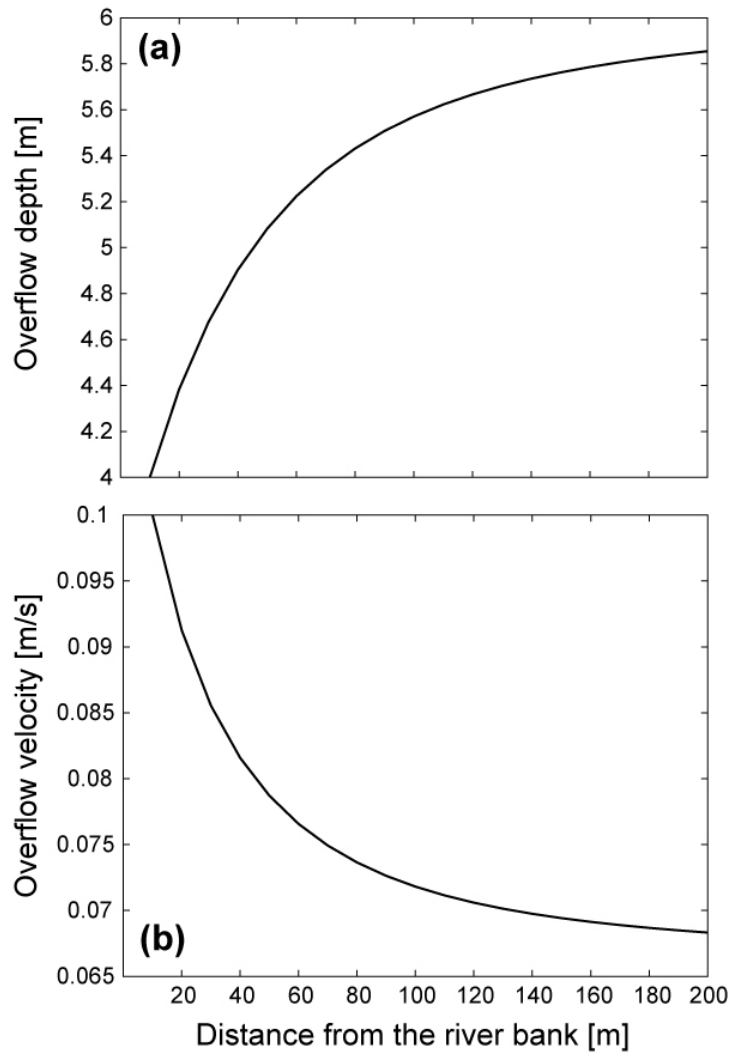

Figure S2. The profiles of (a) overflow depth and (b) overflow velocity across the distance from the river bank for Test 3.

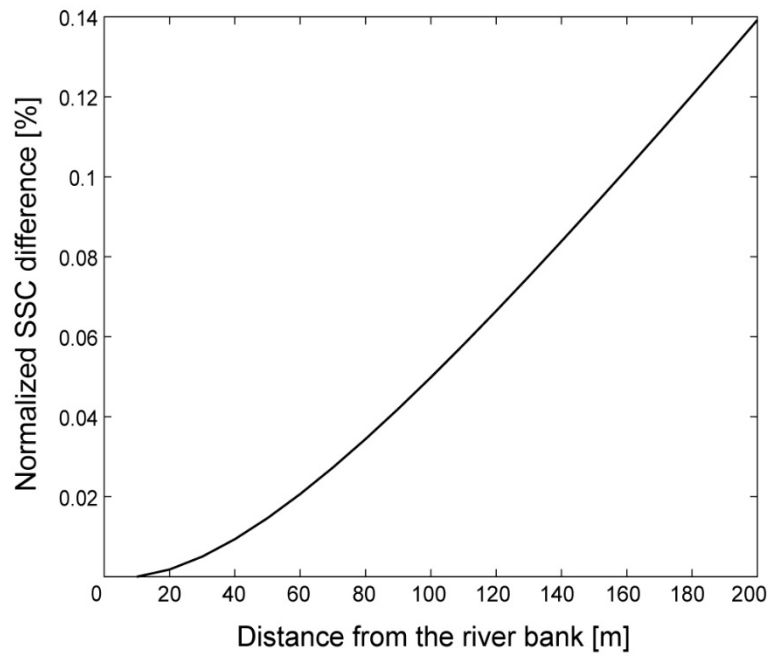

Figure S3. The normalized ratio of differences in total suspended sediment concentration (SSC) of all grain sizes between Tests 1 and 3  $\left(\frac{total\ SSC_1 - total\ SSC_3}{total\ SSC_1}\right)$ .
